# Supplementary material
Source: HighWire-hosted journal article supplement (https://www.cancerbiomed.org/content/j.issn.2095-3941.2023.0492.1)

# Grades status

Fisher's exact test:  $P = 0.357$

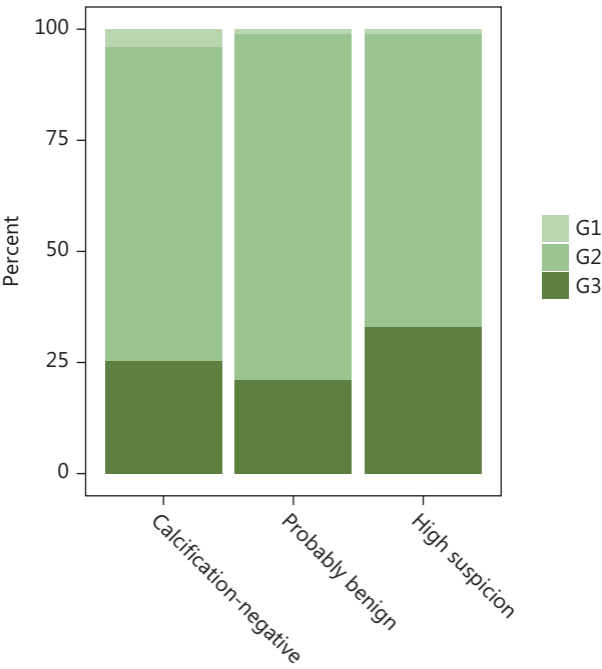

Supplement: media-2 [file media-2.pdf]
